# Supplementary material for: Barx2 and Fgf10 regulate ocular glands branching morphogenesis by controlling extracellular matrix remodeling
Source: Oxford University Press journal article supplement (doi:10.1242/dev.066241), 2011-07-12
Supplement: dev066241tables1.pdf [file dev066241tables1.pdf]

**Table S1. Correlation of eyelid and lacrimal gland (LG) phenotypes in *Barx2* null mice**

| Eye phenotype                                                 | LG phenotype          |       |           |               | Total number of eyes studied |
|---------------------------------------------------------------|-----------------------|-------|-----------|---------------|------------------------------|
|                                                               | Normal/slightly small | Small | Vestigial | Absence of LG |                              |
| Open eyelid eye surface inflammation                          | 0                     | 7     | 3         | 1             | 11                           |
| Normal eyelid closure (no inflammation)                       | 4                     | 2     | 0         | 0             | 6                            |
| Slit eye (internal eyelid surface fused with corneal surface) | 0                     | 0     | 1         | 6             | 7                            |

Correlation of eye inflammation, eyelid and LG defects was studied in 3- to 6-month-old *Barx2* null mice.
