# Supplementary material for: Barx2 and Fgf10 regulate ocular glands branching morphogenesis by controlling extracellular matrix remodeling
Source: Oxford University Press journal article supplement (doi:10.1242/dev.066241), 2011-07-12
Supplement: dev066241tables2.pdf [file dev066241tables2.pdf]

**Table S2. Expression of matrix metalloproteinases (MMPs) and tissue inhibitors of metalloproteinases (TIMPs) in separated lacrimal gland mesenchyme and epithelium**

| Protein      | Epithelium | Mesenchyme |
|--------------|------------|------------|
| <i>Barx2</i> | ++         | –          |
| <i>Barx1</i> | –          | +++        |
| <i>Timp1</i> | +          | ++         |
| <i>Timp2</i> | ++         | +++        |
| <i>Timp3</i> | –          | +          |
| <i>Timp4</i> | –          | +          |
| <i>Mmp2</i>  | ++         | +++        |
| <i>Mmp3</i>  | –          | ++         |
| <i>Mmp9</i>  | +          | ++         |

+++ , strong expression, ++, moderate expression, +, weak expression, –, no expression.

Lacrimal glands were obtained from E16.5 embryos and epithelium and mesenchyme were enzymatically separated and processed for quantitative RT-PCR as described in Materials and methods.
